# Supplementary material for: Removal of manganous dithionate (MnS2O6) with MnO2 from the desulfurization manganese slurry
Source: Royal Society of Chemistry journal article supplement (doi:10.1039/c9ra09810k), 2020-01-01
Supplement: c9ra09810k1.pdf [file c9ra09810k1.pdf]

Supporting Information

## **Removal of manganous dithionate ( $\text{MnS}_2\text{O}_6$ ) with natural $\text{MnO}_2$ from the desulfurization manganese slurry**

Lin Yang<sup>†, \*\*</sup>, Cheng Wang<sup>†</sup>, Lu Yao<sup>†, ‡</sup>, Xia Jiang<sup>†, ‡</sup>, Wenju Jiang<sup>†, \*\*</sup>, Jianjun Li<sup>†, ‡</sup>

<sup>†</sup> College of Architecture and Environment, Sichuan University, Chengdu 610065, P.R. China

<sup>‡</sup> National Engineering Research Center for Flue Gas Desulfurization, Chengdu 610065, P.R.

China

\*Corresponding author: L. Yang ([andyiyin@sina.com](mailto:andyiyin@sina.com)) and W. J. Jiang ([wenjuijiang@scu.edu.cn](mailto:wenjuijiang@scu.edu.cn)).

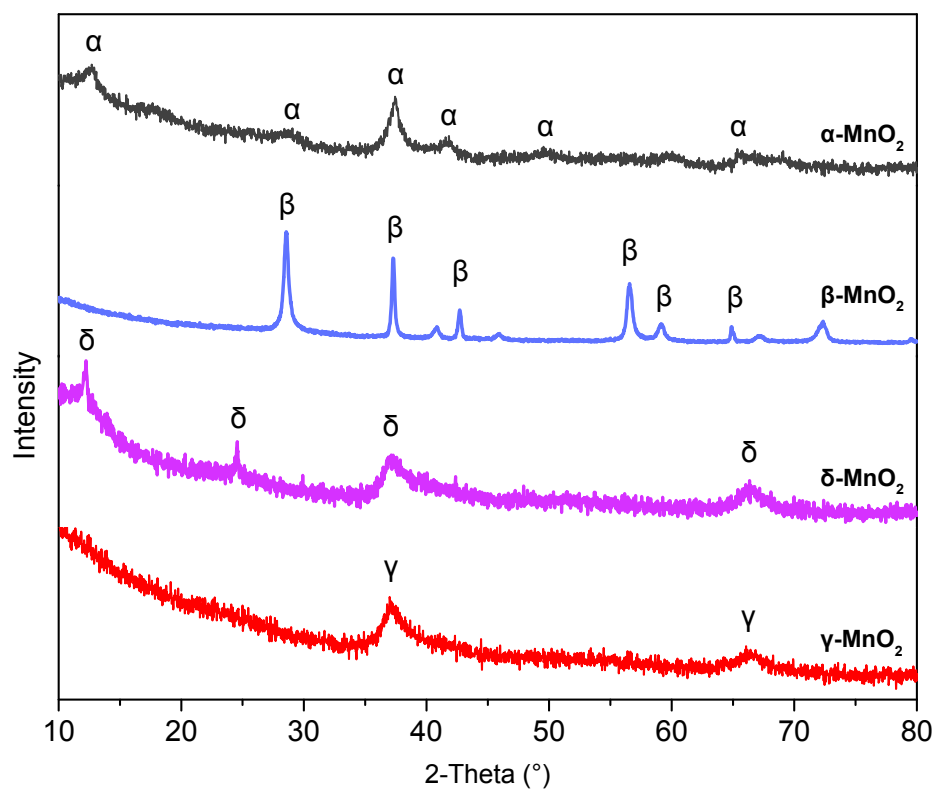

**Figure S1** The XRD patterns of the prepared  $\alpha\text{-MnO}_2$ ,  $\beta\text{-MnO}_2$ ,  $\gamma\text{-MnO}_2$  and  $\delta\text{-MnO}_2$

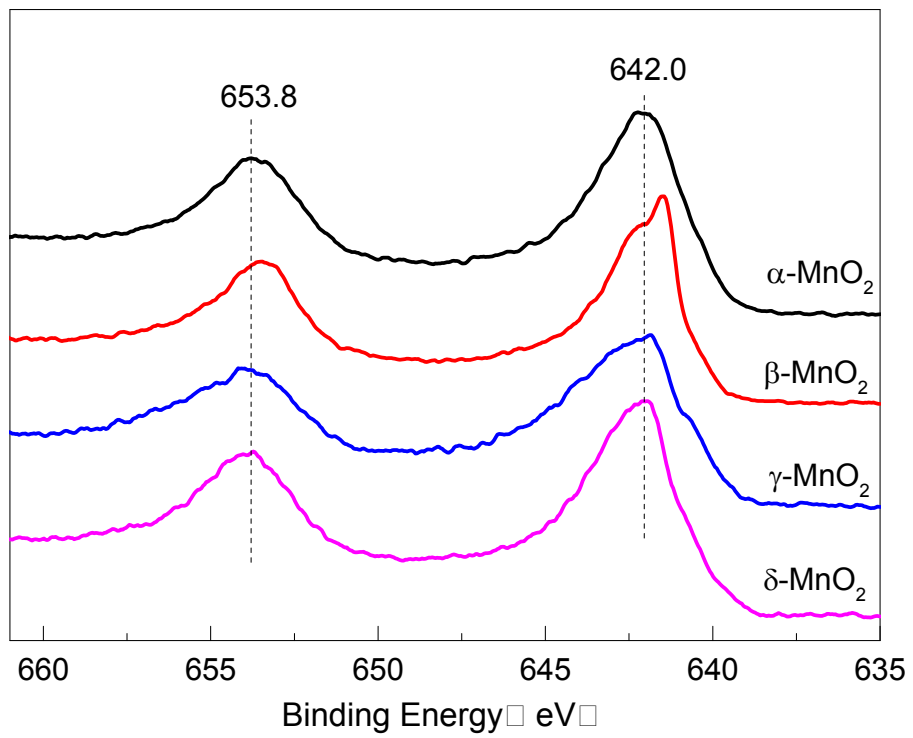

**Figure S2** The Mn 2p spectrum of the prepared  $\alpha$ -MnO<sub>2</sub>,  $\beta$ -MnO<sub>2</sub>,  $\gamma$ -MnO<sub>2</sub> and  $\delta$ -MnO<sub>2</sub>

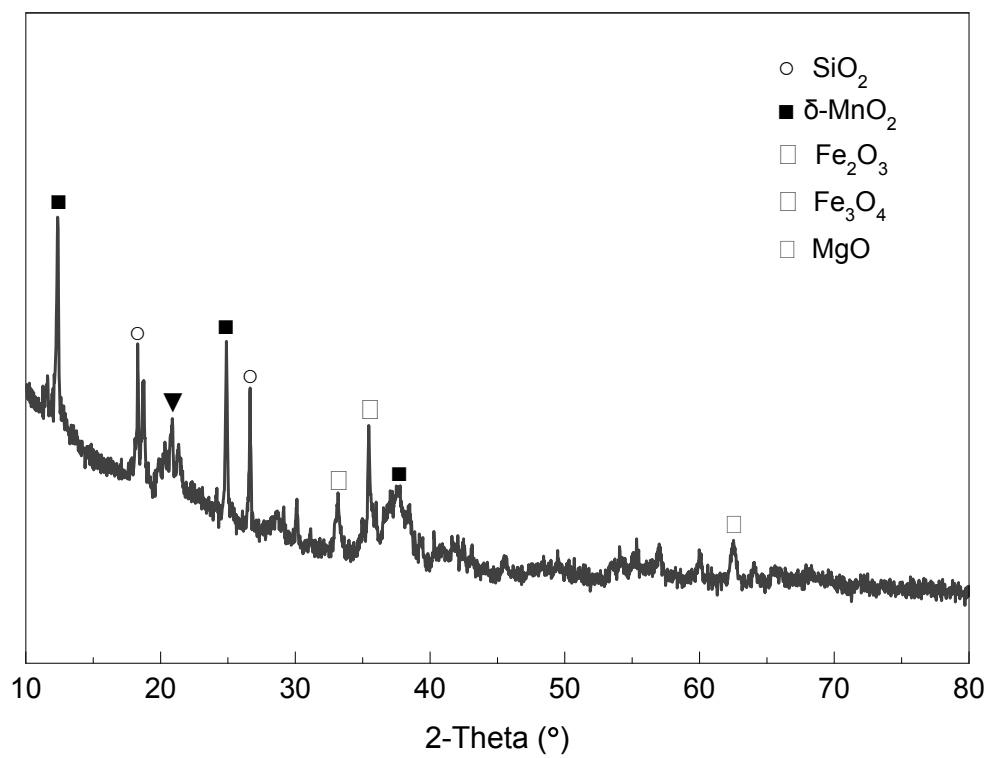

**Figure S3** The XRD pattern of the natural MnO<sub>2</sub> ore used in this study

**Table S1 The calculation of MD decomposition with different initial concentration**

| Initial MD<br>(g/L) | Final MD<br>concentration<br>(g/L) | Removal<br>efficiency<br>(%) | Decomposed MD per<br>unit MnO <sub>2</sub><br>(mg/L·g MnO <sub>2</sub> ) |
|---------------------|------------------------------------|------------------------------|--------------------------------------------------------------------------|
| 4.00                | 0.14                               | 96.40                        | 39                                                                       |
| 6.00                | 0.56                               | 90.73                        | 54                                                                       |
| 8.00                | 1.13                               | 85.81                        | 69                                                                       |
| 10.00               | 1.76                               | 82.38                        | 82                                                                       |
| 12.00               | 2.28                               | 80.96                        | 97                                                                       |
